# Supplementary material for: Lysyl hydroxylases are transcription targets for GATA3 driving lung cancer cell metastasis
Source: PubMed Central journal article supplement (PMC6085355; doi:10.1038/s41598-018-30309-9), 2018-08-09
Supplement: 41598_2018_30309_MOESM1_ESM.pdf [file 41598_2018_30309_MOESM1_ESM.pdf]

## **Lysyl hydroxylases are transcription targets for GATA3 driving lung cancer cell metastasis**

Wei Liu<sup>1,2,6</sup>, Ting Zhang<sup>1,6</sup>, Lixia Guo<sup>1</sup>, Yuanyuan Wang<sup>1,3</sup>, Yanan Yang<sup>1,4,5,7</sup>

<sup>1</sup> Thoracic Disease Research Unit, Division of Pulmonary and Critical Care Medicine, College of Medicine and Science, Mayo Clinic, Rochester, Minnesota, USA

<sup>2</sup> Department of Respiratory, the Second Affiliated Hospital, the Fourth Military Medical University, Xi'an, ShaanXi, China

<sup>3</sup> Department of Respiratory Medicine, East Hospital, Tongji University School of Medicine, Shanghai, China

<sup>4</sup> Department of Biochemistry and Molecular Biology, College of Medicine and Science, Mayo Clinic, Rochester, Minnesota, USA

<sup>5</sup> Developmental Therapeutics and Cell Biology programs, Mayo Clinic Cancer Center, Rochester, Minnesota, USA

<sup>6</sup> These authors contributed equally

<sup>7</sup> Corresponding author. E-mail: [yang.yanan@mayo.edu](mailto:yang.yanan@mayo.edu)

**Fig.1 uncut western blot gels**

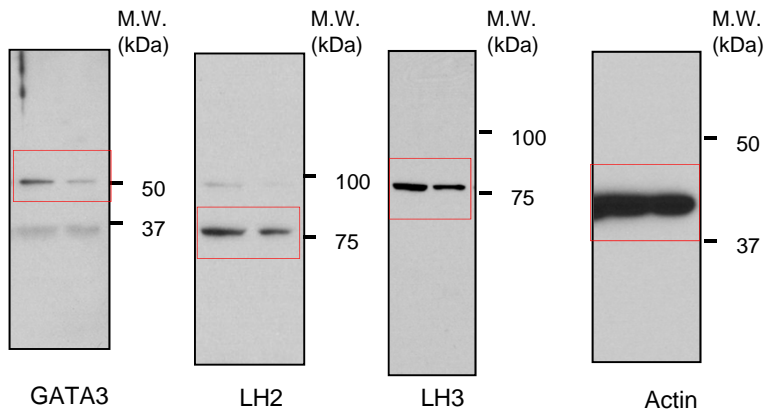

**Fig.2 uncut western blot gels**

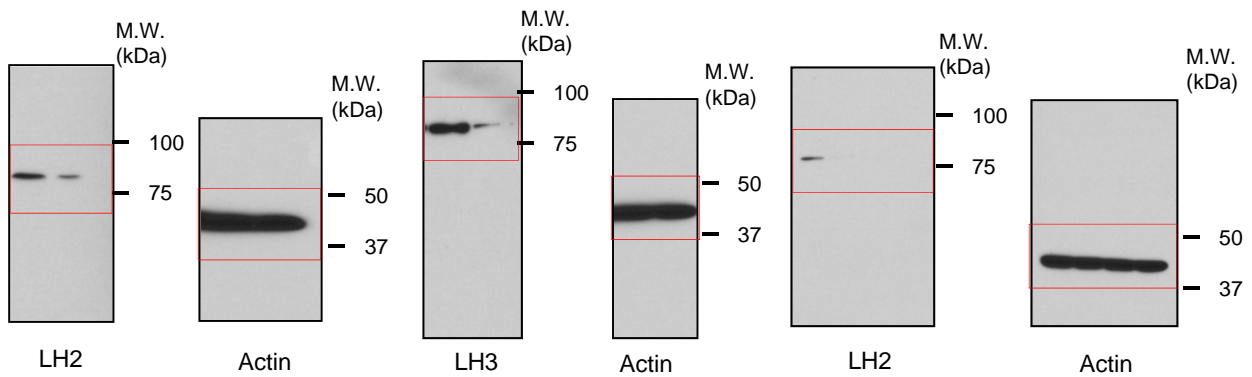

**Fig.3 uncut western blot gels**

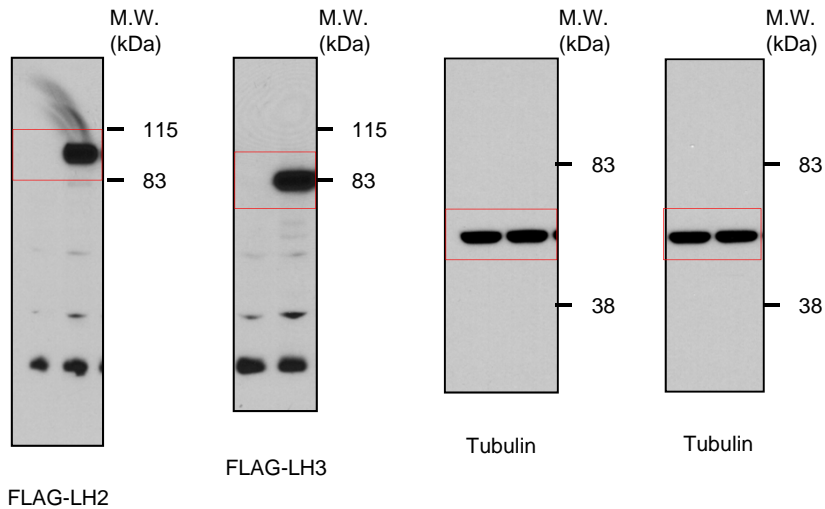

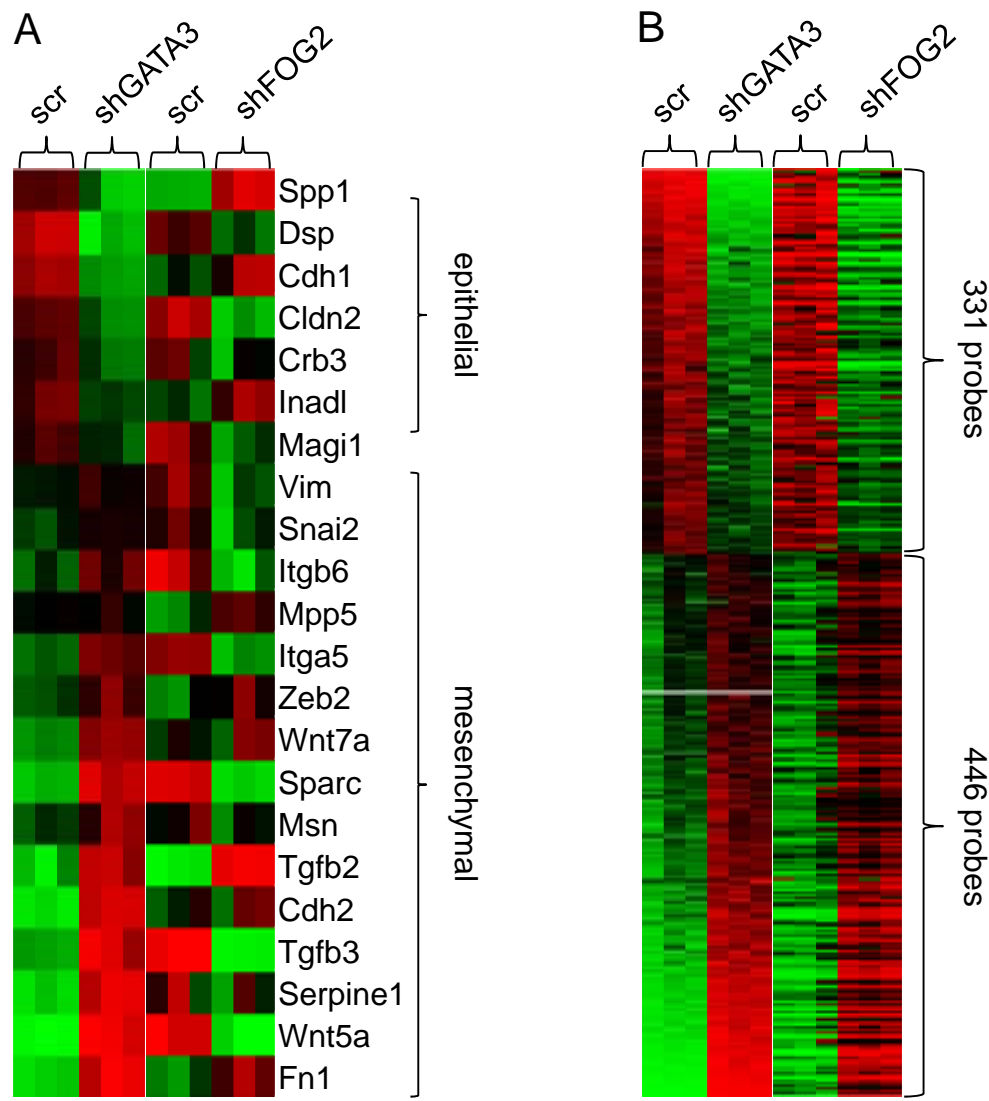

**Supplemental Fig.2.** GATA3 and FOG2 commonly and differentially regulate gene expression. (A) Heatmap for a list of EMT-related genes that were differentially changed in 344SQ cells expressing FOG2 or GATA3 shRNAs. (B) Heatmap for genes commonly regulated in 344SQ cells expressing FOG2 or GATA3 shRNAs.
